# Supplementary material for: High yield regeneration of 1,4-NAD(P)H via selective adsorption-/desorption-mediated visible-light photocatalysis on a noble-metal-free catalyst
Source: Royal Society of Chemistry journal article supplement (doi:10.1039/d4ta08342c), 2025-01-01
Supplement: d4ta08342c1.pdf [file d4ta08342c1.pdf]

## Supporting Information

### **High Yield Regeneration of 1,4-NAD(P)H by Selective Ad/De-sorption-Mediated Visible-Light Photocatalysis on a Noble-Metal-Free Catalyst**

Zheng-Wu Wang,<sup>†a</sup> Xin Tan,<sup>†a</sup> Zheng-Hao Wu,<sup>a</sup> Jun-Hao Chen,<sup>a</sup> Yi-Zhou Zhu,<sup>\*b</sup> and He-Fang Wang<sup>\*a</sup>

Zheng-Wu Wang, Xin Tan, Zheng-Hao Wu, Jun-Hao Chen and He-Fang Wang

Research Center for Analytical Sciences, College of Chemistry, Nankai University, Tianjin Key Laboratory of Biosensing and Molecular Recognition, Tianjin, 300071, China

E-mail: wanghefang@nankai.edu.cn

Yi-Zhou Zhu

State Key Laboratory and Institute of Elemento-Organic Chemistry, Nankai University, Tianjin, 300071, China

E-mail: zhuyizhou@nankai.edu.cn

## 1. Experimental section

### 1.1 Reagents

$\text{Al}(\text{NO}_3)_3 \cdot 9\text{H}_2\text{O}$ ,  $\text{AlCl}_3$  and triethanolamine (TEOA) were purchased from Aladdin (Shanghai, China). Urea (99%) were purchased from Shanghai Macklin Biochemical Co., Ltd (Shanghai, China). Wahaha pure water was used in this work.  $\text{BiCl}_3$ ,  $\text{Bi}(\text{NO}_3)_3 \cdot 5\text{H}_2\text{O}$ ,  $\beta$ -Nicotinamide adenine dinucleotide ( $\text{NAD}^+$ , 97%), reduced coenzyme I ( $\beta$ -NADH, 98%),  $\beta$ -Nicotinamide adenine dinucleotide phosphate ( $\beta$ -NADP<sup>+</sup>, 95%), and reduced coenzyme II ( $\beta$ -NADPH, 97%) were purchased from Heowns Biochemical Technology Co., Ltd (Tianjin, China). Alcohol dehydrogenase (ADH, 99%) was purchased from KeyGEN Bio TECH (Jiangsu, China). HCl and  $\text{HNO}_3$  were from Bohua Chemical Reagent Co., Ltd (Tianjin, China). Benzylamine and *N*-benzylbenzaldimine were from Meryer (Shanghai, China).

### 1.2 Apparatus

The X-ray powder diffraction (XRD) patterns were recorded using a Rigaku D/max-2500 X-ray diffractometer (Rigaku, Japan). Morphology and microstructure were characterized via high resolution transmission electron microscopy (HRTEM) using a Talos F200X G2 high-resolution transmission electron microscope (FEI, Czech) operating at a 200 kV accelerating voltage. The UV-vis diffuse reflection spectra (DRS) with  $\text{BaSO}_4$  as a reference and the UV-vis absorption spectra of all aqueous solutions were measured on a UV-vis spectrophotometer (UV-2600, Shimadzu, Japan). The photocurrent measurements were carried out using an electrochemical workstation (Zahner, Germany) equipped with standard three electrodes (an appropriate amount of the sample suspension on a conductive indium tin oxide glass, a standard saturated calomel electrode (SCE) as reference electrode, and platinum as the counter electrode). A  $0.5 \text{ mol} \cdot \text{L}^{-1} \text{ Na}_2\text{SO}_4$  aqueous solution was used as the electrolyte. The Brunauer-Emmett-Teller (BET) method was employed to determine specific surface area, utilizing a Micromeritics ASAP 2460 specific surface area analyzer (Micromeritics, US). X-ray photoelectron spectroscopy (XPS) tests were performed on an Axis Ultra DLD X-ray photoelectron spectrometer (Kratos Analytical Ltd, UK).  $^1\text{H}$  NMR spectra were recorded on a Bruker AC-400 FT (400 MHz). High-performance liquid chromatography (HPLC, Waters 2695 with a C18 column) was used for analysis of the products from photocatalytic  $\text{NAD}^+$  reduction and benzylamine oxidation.

### **1.3 Synthesis of $\text{Bi}_{12}\text{O}_{17}\text{Cl}_2\text{-Bi}_{48}\text{Al}_2\text{O}_{75}\text{-Al}_2\text{O}_3$ , $\text{Bi}_{12}\text{O}_{17}\text{Cl}_2\text{-Al}_2\text{O}_3$ , and $\text{Bi}_{48}\text{Al}_2\text{O}_{75}\text{-Al}_2\text{O}_3$ .**

A certain amount of  $\text{BiCl}_3$ ,  $\text{Al}(\text{NO}_3)_3 \cdot 9\text{H}_2\text{O}$ , urea and 100 mL purified water were weighed in a beaker. After ultrasonic treatment, the mixture was stirred at room temperature for 30 min, and then the mixture was transferred into Teflon linear autoclave and heated at 125 °C for 15 h. The reaction vessels were taken out and cooled to room temperature, and then the mixture was transferred to 50 mL centrifuge tubes, the solid was harvested and washed with pure water twice and ethanol once, and then was dried at 60 °C to obtain the precursors. Finally, the precursors were calcined at 450 °C in Muffle furnace for 4 h to get  $\text{Bi}_{12}\text{O}_{17}\text{Cl}_2\text{-Bi}_{48}\text{Al}_2\text{O}_{75}\text{-Al}_2\text{O}_3$ . The feeding ratios of  $\text{Al}(\text{NO}_3)_3 \cdot 9\text{H}_2\text{O}/\text{BiCl}_3$  (1/9, 3/7, 5/5, 7/3 and 9/1) and urea/ $\text{BiCl}_3$  (2/1, 8/1, 16/1 and 32/1) and hydrothermal temperature (70, 90, 125 and 155 °C) were changed to research the best condition to get the best  $\text{Bi}_{12}\text{O}_{17}\text{Cl}_2\text{-Bi}_{48}\text{Al}_2\text{O}_{75}\text{-Al}_2\text{O}_3$  photocatalyst. For synthesis of  $\text{Bi}_{12}\text{O}_{17}\text{Cl}_2\text{-Al}_2\text{O}_3$ , the anhydrous  $\text{AlCl}_3$  instead of  $\text{Al}(\text{NO}_3)_3 \cdot 9\text{H}_2\text{O}$  was used. For synthesis of  $\text{Bi}_{48}\text{Al}_2\text{O}_{75}\text{-Al}_2\text{O}_3$ ,  $\text{Bi}(\text{NO}_3)_3 \cdot 5\text{H}_2\text{O}$  instead of  $\text{BiCl}_3$  was used. Other synthetic operations were the same as the preparation of  $\text{Bi}_{12}\text{O}_{17}\text{Cl}_2\text{-Bi}_{48}\text{Al}_2\text{O}_{75}\text{-Al}_2\text{O}_3$ .

### **1.4 Determination of composition content of $\text{Bi}_{12}\text{O}_{17}\text{Cl}_2\text{-Bi}_{48}\text{Al}_2\text{O}_{75}\text{-Al}_2\text{O}_3$ .**

The composition content in  $\text{Bi}_{12}\text{O}_{17}\text{Cl}_2\text{-Bi}_{48}\text{Al}_2\text{O}_{75}\text{-Al}_2\text{O}_3$  was determined by measuring the  $\text{Cl}^-$  content in the supernatant after the hydrothermal reactions. For the determination of  $\text{Cl}^-$ , 1 mL of supernatant was mixed with 19 mL of  $\text{H}_2\text{O}$  and 1 mL of 0.053 M  $\text{K}_2\text{Cr}_2\text{O}_7$ . Then, the pH was adjusted to 7 using 1 M of  $\text{HNO}_3$  solution. The  $\text{AgNO}_3$  solution of 0.0105 M was added into mixture until the brick red precipitate appeared. The concentration of  $\text{Cl}^-$  in the supernatant was calculated based on volume of  $\text{AgNO}_3$  solution. The  $\text{Bi}_{12}\text{O}_{17}\text{Cl}_2$  content was calculated from  $\text{Cl}$  in the solid (total feeding of  $\text{Cl}$  minus  $\text{Cl}$  in the supernatant), and  $\text{Bi}_{48}\text{Al}_2\text{O}_{75}$  content was calculated from  $\text{Bi}$  (total  $\text{Bi}$  minus  $\text{Bi}$  in  $\text{Bi}_{12}\text{O}_{17}\text{Cl}_2$ ), and  $\text{Al}_2\text{O}_3$  content was from  $\text{Al}$  (total  $\text{Al}$  minus  $\text{Al}$  in  $\text{Bi}_{48}\text{Al}_2\text{O}_{75}$ ).

### **1.5 Visible light photocatalytic regeneration of NADH with TEOA as sacrificial agent**

An aqueous dispersion of photocatalyst ( $1.5 \text{ g} \cdot \text{L}^{-1}$ ), TEOA (0.5 M) and  $\text{NAD}^+$  (0.3 mM) was added into the quartz reactor, and ultrasonically treated for 10 min. The dispersion was then exposed to a 20 W LED lamp ( $\lambda=455 \text{ nm}$ ). 3 mL of suspension was sucked out from the quartz tube at different time intervals (20, 40, 60, 90 min). The supernatants acquired by filtration of the suspensions with  $0.22 \mu\text{m}$  filters were measured by the UV-vis absorption spectrometry or HPLC chromatography for determination of NADH concentration ( $C_{\text{NADH}}$ ). Additionally,  $^1\text{H}$

NMR spectra was recorded to identify 1,4-NADH. The yield of NADH was calculated according to the eq. 1.

$$\text{Yield of NADH (\%)} = \frac{C_{NADH}}{C_{NAD^+}} \times 100\% \quad (1)$$

where  $C_{NAD^+}$  was the initial concentration of  $NAD^+$  ( $0.2 \text{ g}\cdot\text{L}^{-1}$  is equivalent to  $0.3 \text{ mM}$ ).

### 1.6 Coupling photocatalytic reduction of $NAD^+$ with oxidation of benzylamine

An aqueous dispersion of photocatalyst ( $1.5 \text{ g}\cdot\text{L}^{-1}$ ), benzylamine ( $5 \text{ mM}$ ) and  $NAD^+$  ( $0.3 \text{ mM}$ ) were added to the quartz reactor, and then ultrasonically treated for 10 min. The dispersion was exposed to a 20 W LED lamp ( $\lambda=455 \text{ nm}$ ). 3 mL of suspensions were sucked out from the quartz tube at different time intervals, and the supernatants acquired by filtration of the liquid phase with  $0.22 \mu\text{m}$  filters were detected by HPLC. The yield of NADH and *N*-benzylbenzaldimine was calculated according to standard curves.

### 1.7 Determination of the selectivity of 1,4-NADH

The reaction for biocatalytic consuming the biologically active 1,4-NADH was used to measure the selectivity of 1,4-NADH. ADH ( $2 \text{ g}\cdot\text{L}^{-1}$ , 1.5 KU) and acetaldehyde ( $100 \mu\text{L}$ ) were added to the supernatant from the photocatalytic regeneration of NADH in **1.5** or **1.6** for certain durations. The concentration of biologically active 1,4-NADH ( $C_{1,4-NADH}$ ) was calculated according to the following eq. 2:

$$C_{1,4-NADH} = C_{NADH\text{-photocatalysis}} - C_{NADH\text{-after bio-catalysis}} \quad (2)$$

where  $C_{1,4-NADH}$  was the concentration of biologically active 1,4-NADH ( $\text{g}\cdot\text{L}^{-1}$ ) after biocatalysis reaction,  $C_{NADH\text{-photocatalysis}}$  was the concentration of total regenerated NADH measured in photocatalysis process.  $C_{NADH\text{-after bio-catalysis}}$  was the concentration of residual non-biologically active NADH measured after bio-catalysis process with ADH and acetaldehyde added.

The selectivity of 1,4-NADH was calculated according to eq. 3:

$$\text{selectivity of 1,4-NADH (\%)} = \frac{C_{1,4-NADH}}{C_{NADH\text{-photocatalysis}}} \quad (3)$$

The selectivity of 1,4-NADPH was determined according to the same procedure as 1,4-NADH.

### 1.8 Measurement of adsorption of $NAD^+$ on photocatalyst

The adsorption experiments of  $\text{NAD}^+$  on photocatalyst were the same as **1.5** except without TEOA and light illumination, and the suspensions were kept in the dark. The supernatant was diluted threefold and measured by UV-2600 ultraviolet-visible spectrometer.

### 1.9 Desorption of unreacted $\text{NAD}^+$ after photocatalytic reaction

The eluent of 0.1 M pH~13 was prepared with NaOH for use. After the photocatalytic experiment, the photocatalyst after centrifugation was collected, and then the same volume of eluent as the photocatalytic experiment was added. The resultant dispersion was ultrasonicated for 60 min, and then the supernatant was diluted threefold and measured by UV-2600 ultraviolet-visible spectrometer. The concentration of  $\text{NAD}^+$  desorbed from  $\text{Bi}_{12}\text{O}_{17}\text{Cl}_2\text{-Bi}_{48}\text{Al}_2\text{O}_{75}\text{-Al}_2\text{O}_3$  was calculated according to the calibration curve of  $\text{NAD}^+$  and listed in Table S2.

### 1.10 Successive use of $\text{Bi}_{12}\text{O}_{17}\text{Cl}_2\text{-Bi}_{48}\text{Al}_2\text{O}_{75}\text{-Al}_2\text{O}_3$ for regeneration of NADH

A typical photocatalytic reaction as **1.5** was carried out for 60 min (1 mL of reactants was piped out at 20, 40 and 60 min), and then 3 mL of fresh  $\text{NAD}^+$  (0.3 mM) was added into the photocatalytic system. The above process was repeated again. For each repeat process, the NADH yield was calculated by subtraction of the NADH generated from last cycle from the total NADH.

### 1.11 DFT calculation of the adsorption energies.

The DFT calculations employed the Vienna ab initio simulation package (VASP 5.4.4),<sup>1</sup> where the PBE functional was utilized for exchange-correlation modeling,<sup>2</sup> and the projected augmented wave method described ion-electron interactions.<sup>3</sup> A  $17.53 \times 17.53 \times 21.64$  Å ( $90^\circ \times 90^\circ \times 90^\circ$ , comprising 48 atoms of Al, 2 atoms of Bi, and 75 atoms of O) cell was constructed to simulate the adsorption of  $\text{NAD}^+$  and NADH on the (001) facet of  $\text{Bi}_{48}\text{Al}_2\text{O}_{75}$ . In these simulations, atoms in the upper layer of the surface could move freely, while the bottom three layers (0.9 Å/layer) were fixed, and a 15 Å vacuum layer was utilized along the z-direction. The Monkhorst-Pack grid mesh-based Brillouin zone k-points were uniformly set at  $1 \times 1 \times 1$  for periodic structures,<sup>4</sup> and cutoff energy was set to 500 eV. Convergence criteria were set at  $0.02 \text{ eV} \cdot \text{Å}^{-1}$  for force and  $10^{-5} \text{ eV}$  for energy.

The adsorption energy calculation of  $\text{NAD}^+$  ( $E_{\text{adsNAD}^+}$ ) and NADH ( $E_{\text{adsNADH}}$ ) is based on eq. 4, 5:

$$E_{\text{adsNAD}^+} = E [* \text{NAD}^+] - E [\text{NAD}^+] - E * \quad (4)$$

$$E_{\text{adsNADH}} = E [* \text{NADH}] - E [\text{NADH}] - E * \quad (5)$$

$E^*$ ,  $E[\text{NAD}^+]$ ,  $E[\text{NADH}]$ ,  $E[*\text{NAD}^+]$  and  $E[*\text{NADH}]$  represent the electronic energy of  $\text{Bi}_{48}\text{Al}_2\text{O}_{75}$  (001) facet,  $\text{NAD}^+$ ,  $\text{NADH}$ ,  $\text{NAD}^+$  adsorbed on  $\text{Bi}_{48}\text{Al}_2\text{O}_{75}$  (001) facet and  $\text{NADH}$  adsorbed on  $\text{Bi}_{48}\text{Al}_2\text{O}_{75}$  (001) facet, respectively.

## 2. Supporting figures and tables.

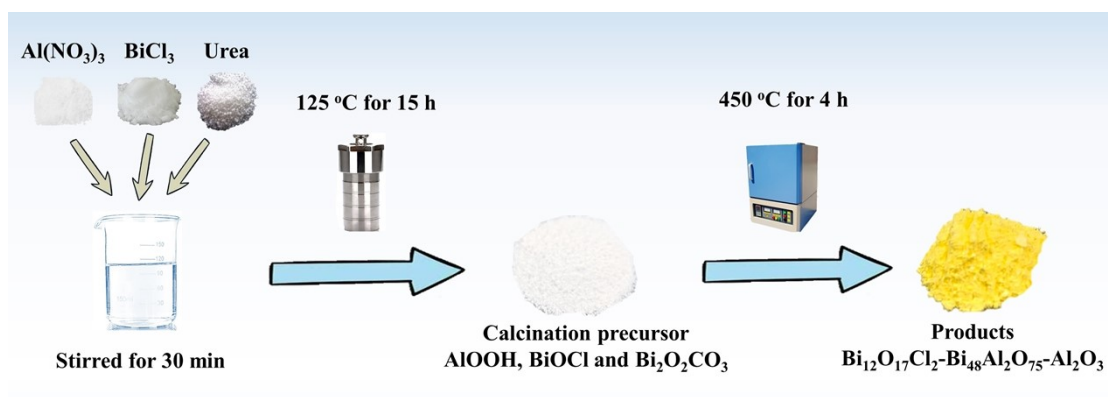

**Fig. S1.** Scheme illustration for preparation of the catalysts.

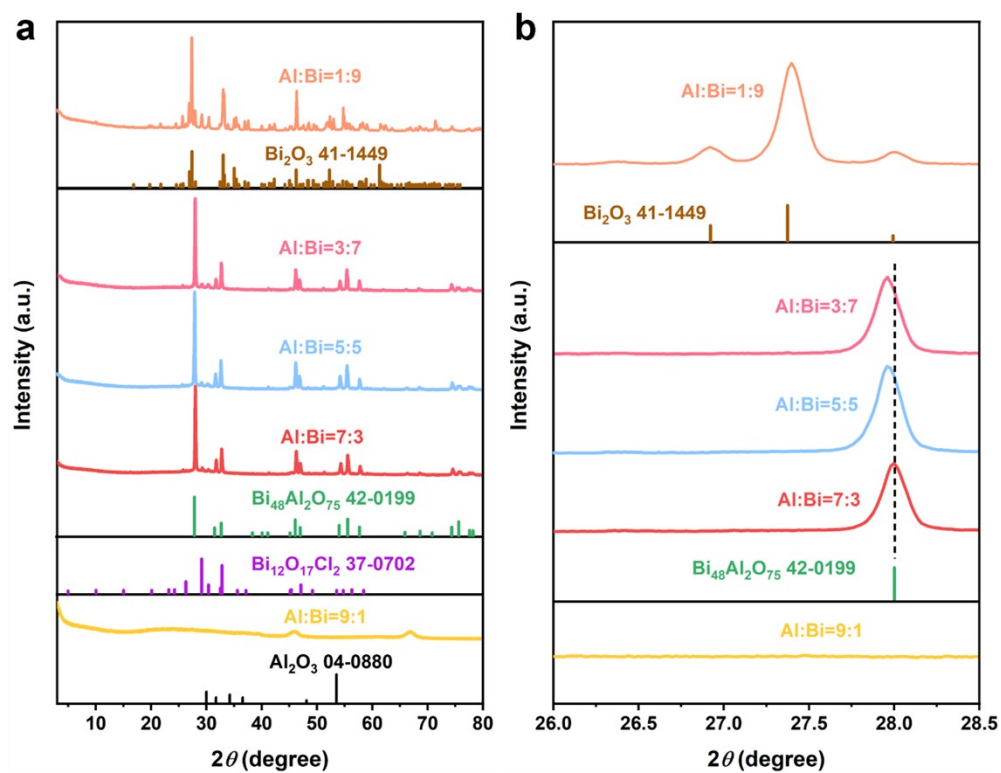

**Fig. S2.** (a) XRD patterns of the calcined products prepared with different mole ratios of Al:Bi of 1:9, 3:7, 5:5, 7:3, and 9:1; and (b) the partial enlarged details of 16-28.5 degree of (a).

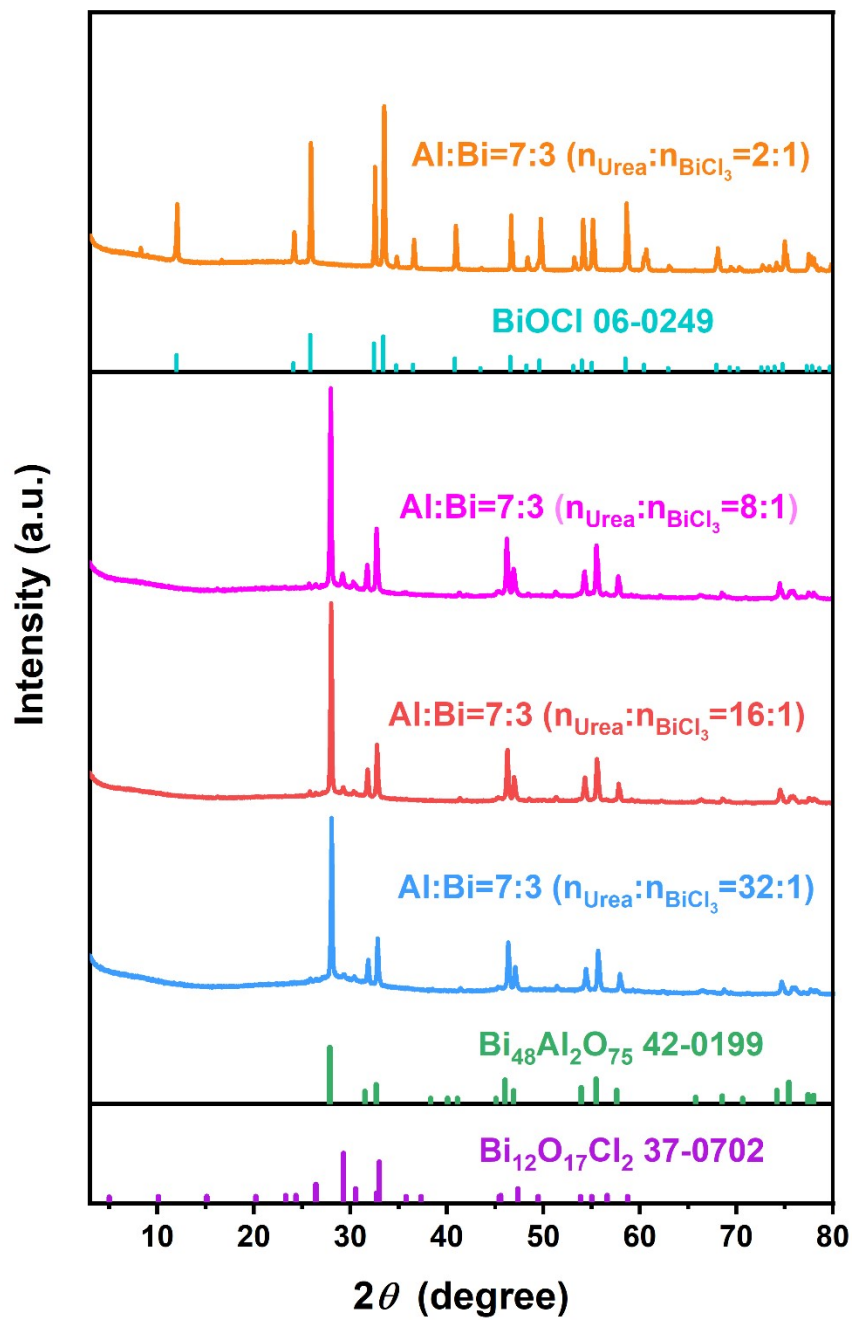

**Fig. S3.** XRD patterns of the calcined products prepared from Al:Bi set at 7:3 with different feeding mole ratio of urea:BiCl<sub>3</sub> of 2:1, 8:1, 16:1, and 32:1.



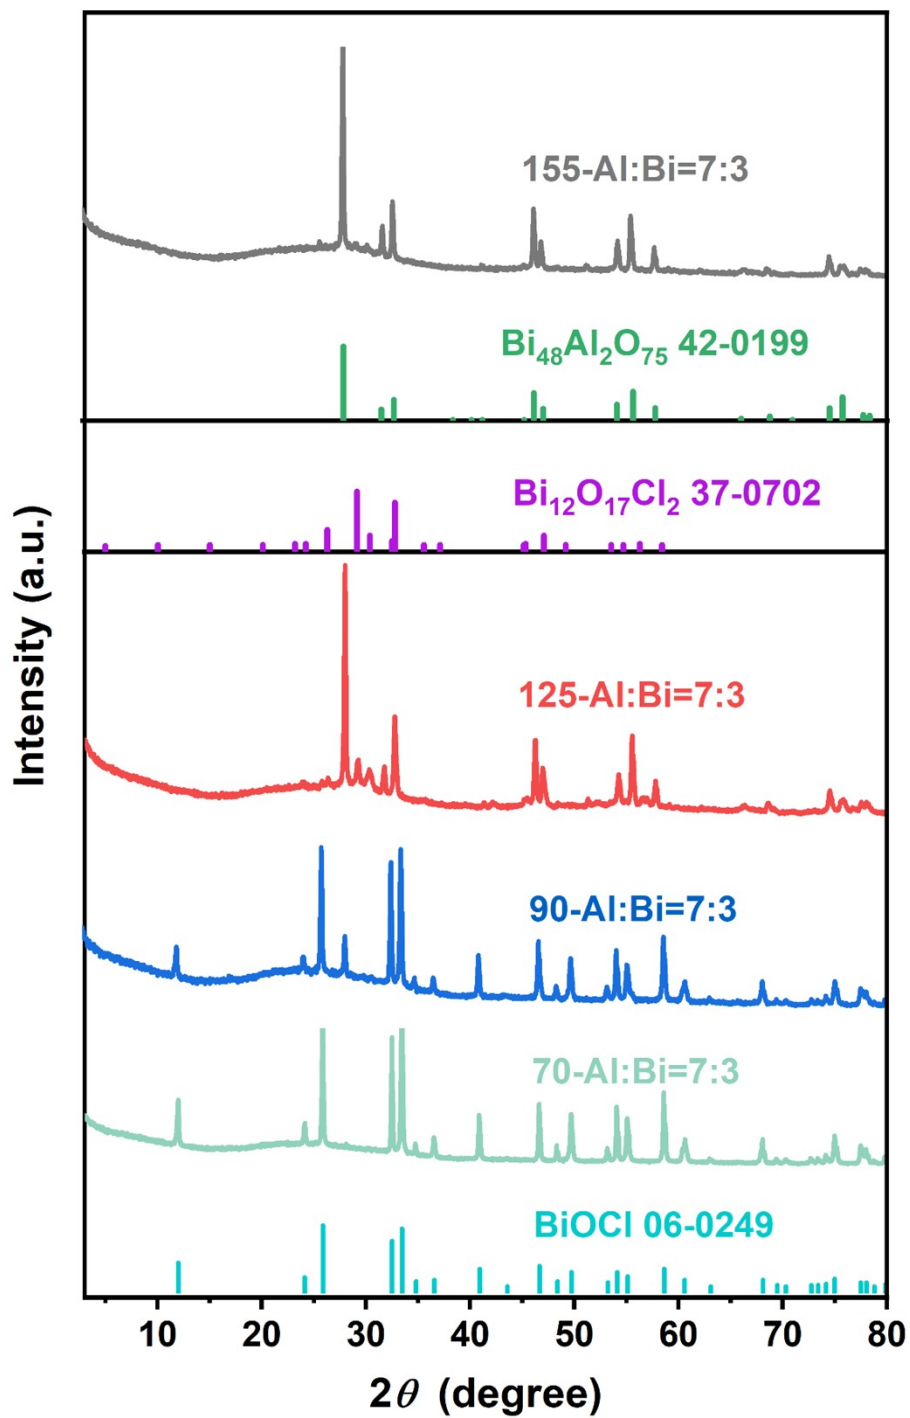

**Fig. S4.** XRD patterns of the calcined products prepared from Al:Bi set at 7:3 with different hydrothermal temperatures of 155, 125, 90 and 70 °C

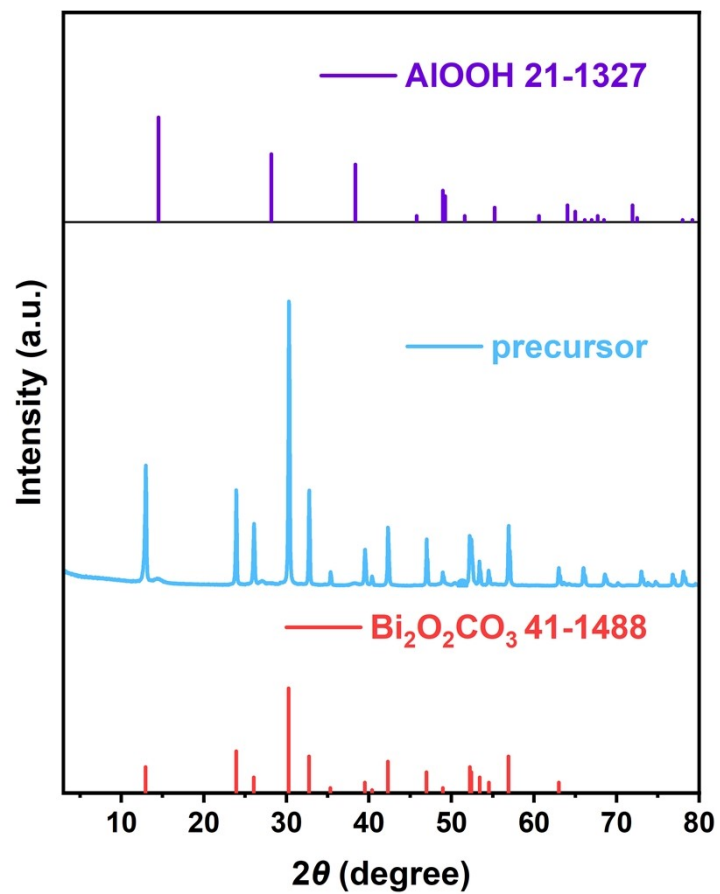

**Fig. S5.** XRD pattern of the calcination precursor acquired from feeding ratio of Al/Bi at 7/3 and urea/Bi at 16/1 and 125 °C hydrothermal temperature.

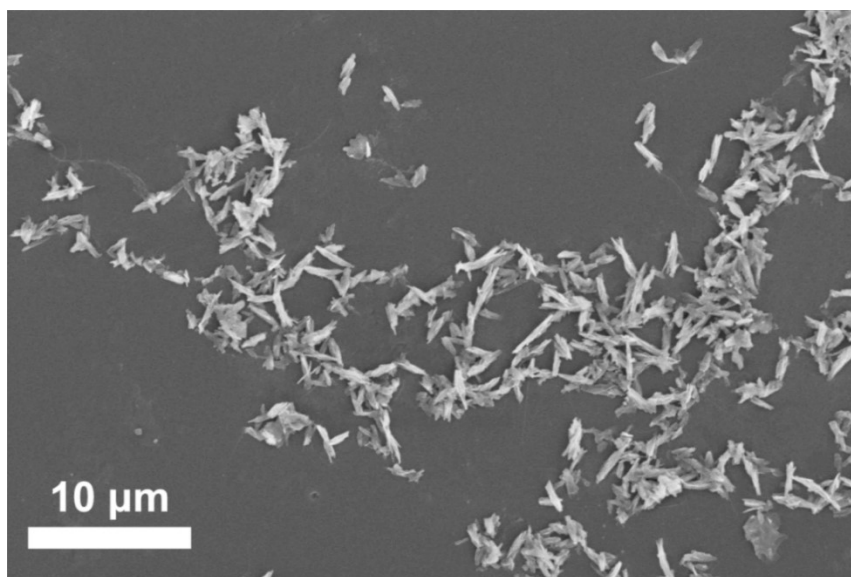

**Fig. S6.** SEM image of  $\text{Bi}_{12}\text{O}_{17}\text{Cl}_2\text{-Bi}_{48}\text{Al}_2\text{O}_{75}\text{-Al}_2\text{O}_3$ .

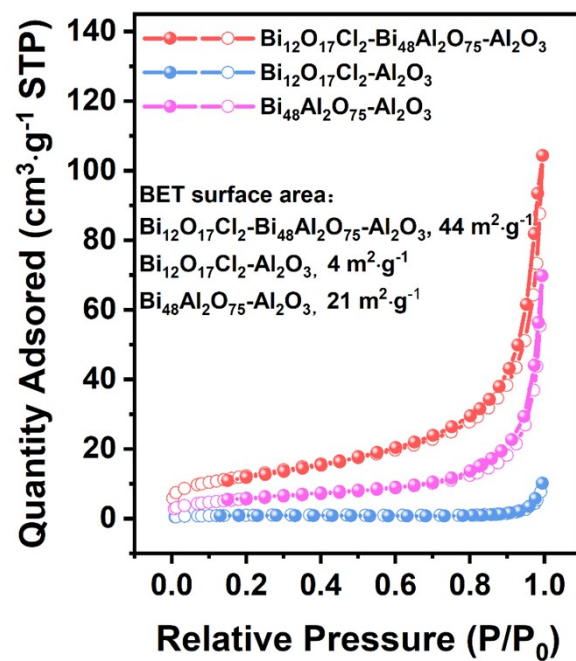

**Fig. S7.**  $\text{N}_2$  adsorption-desorption isotherms of  $\text{Bi}_{48}\text{Al}_2\text{O}_{75}\text{-Al}_2\text{O}_3$ ,  $\text{Bi}_{12}\text{O}_{17}\text{Cl}_2\text{-Bi}_{48}\text{Al}_2\text{O}_{75}\text{-Al}_2\text{O}_3$ ,  $\text{Bi}_{12}\text{O}_{17}\text{Cl}_2\text{-Al}_2\text{O}_3$ .

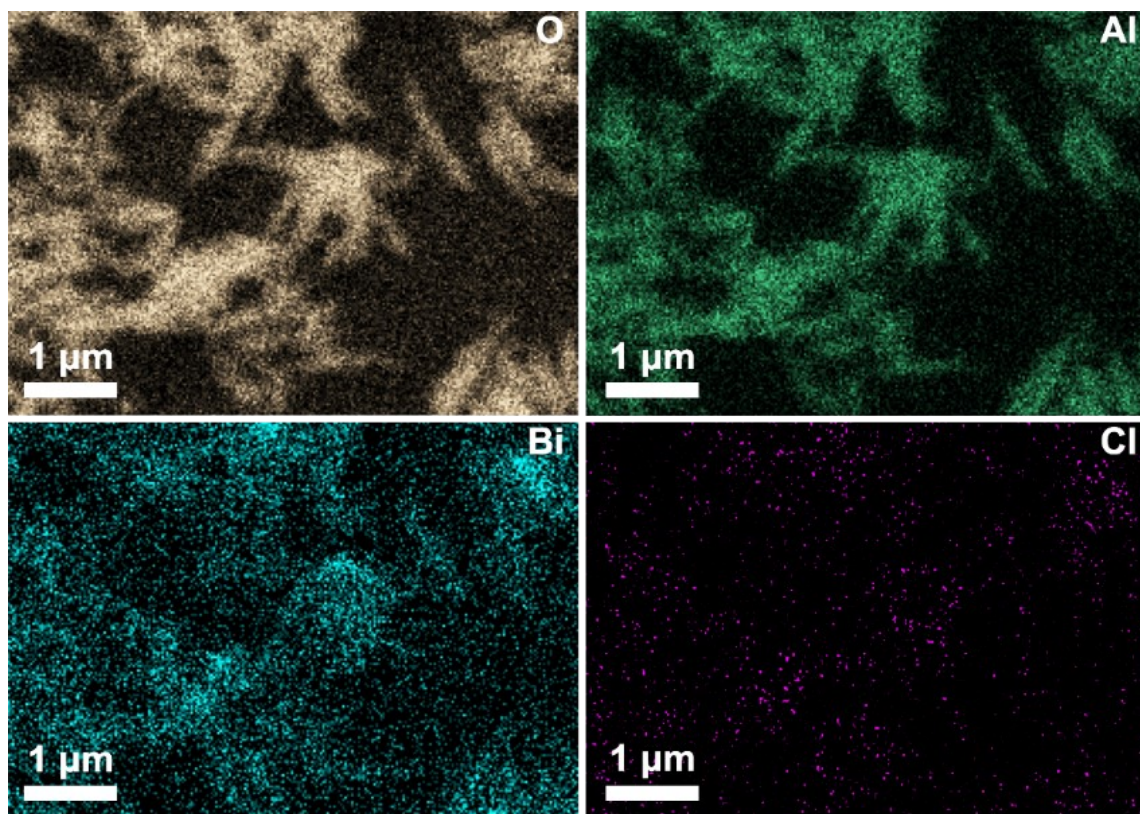

**Fig. S8.** The elemental mapping images of Al, Bi, O and Cl of  $\text{Bi}_{12}\text{O}_{17}\text{Cl}_2\text{-Bi}_{48}\text{Al}_2\text{O}_{75}\text{-Al}_2\text{O}_3$ .

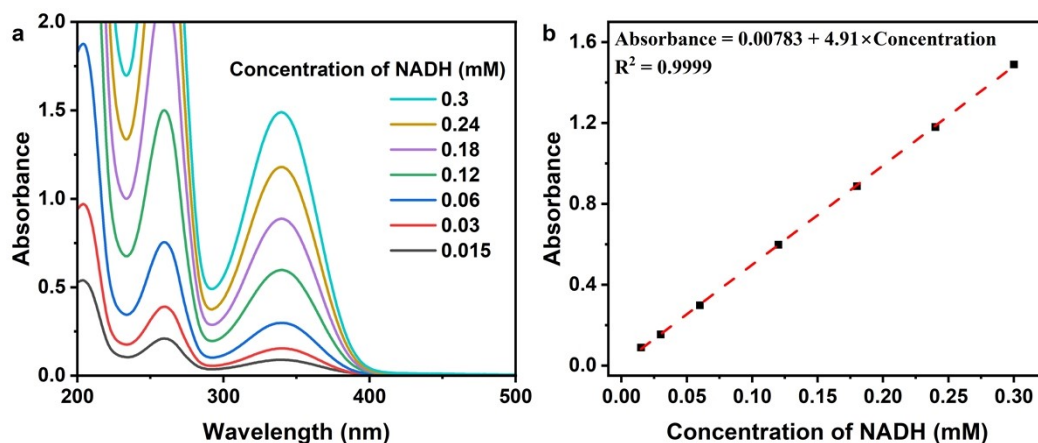

**Fig. S9.** Calibration with standard NADH solutions: (a) UV-Vis spectra of aqueous NADH solutions; (b) corresponding calibration curve derived from the absorbance at 340 nm in (a).

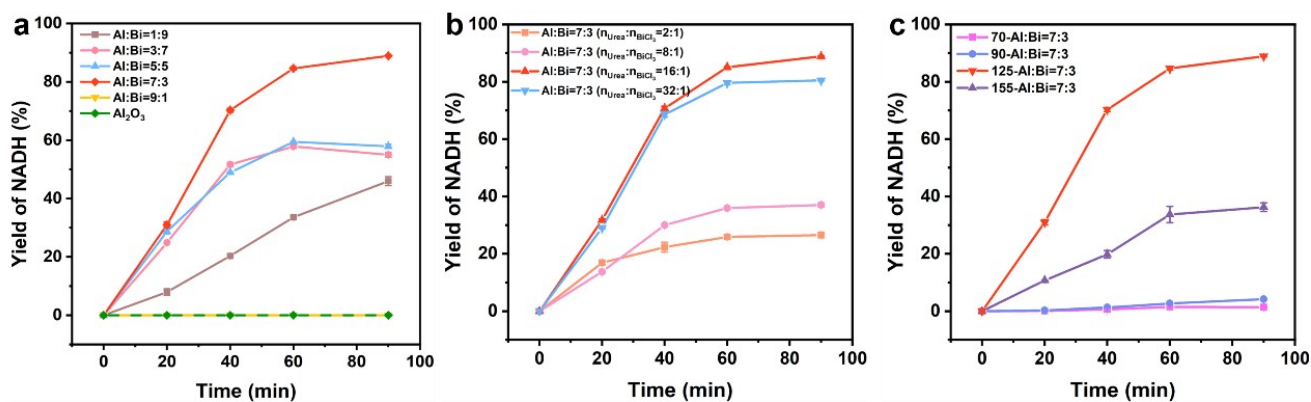

**Fig. S10.** The NADH yields of the catalysts prepared by 450 °C calcination of the precursors from different (a, b) feeding ratios of (a) Al/Bi, (b) urea/Bi and (c) temperature of the hydrothermal reactions.

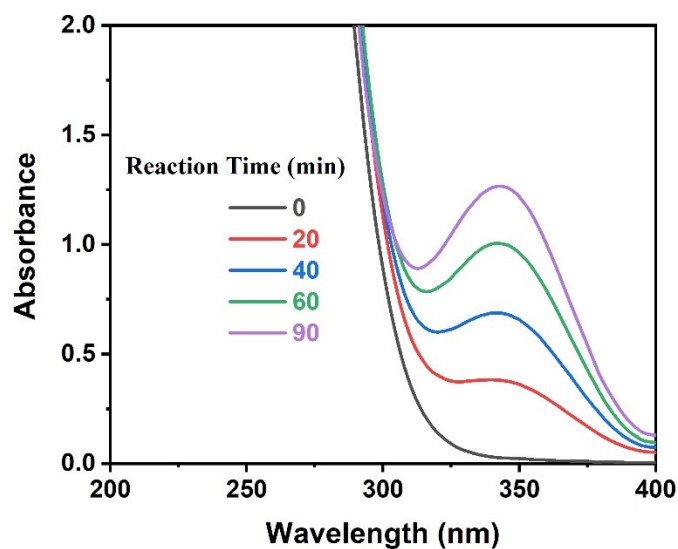

**Fig. S11.** UV-vis absorption spectra of photocatalytic regeneration of NADH at different time by  $\text{Bi}_{12}\text{O}_{17}\text{Cl}_2\text{-Bi}_{48}\text{Al}_2\text{O}_{75}\text{-Al}_2\text{O}_3$  in the presence of TEOA.

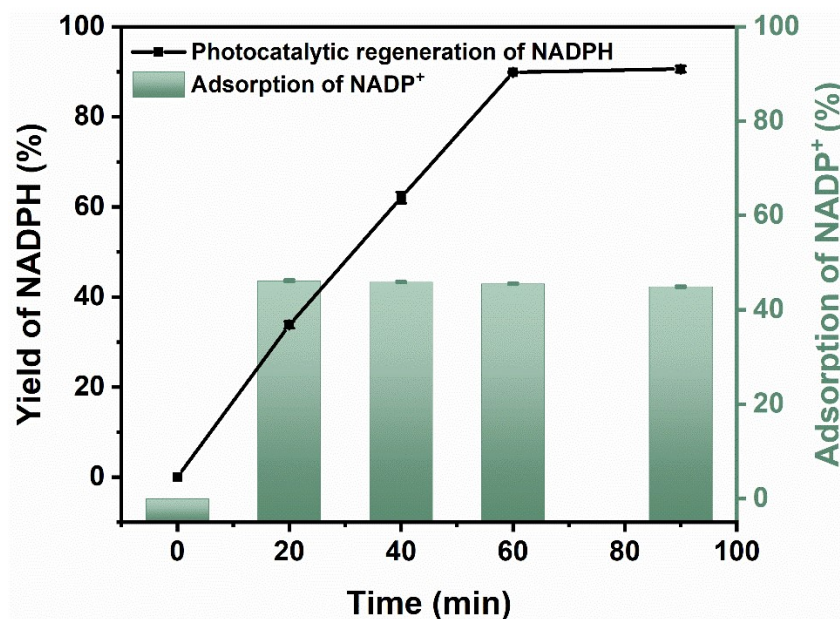

**Fig. S12.** The photocatalytic NADPH yields and NADP<sup>+</sup> adsorption at different time by  $\text{Bi}_{12}\text{O}_{17}\text{Cl}_2\text{-Bi}_{48}\text{Al}_2\text{O}_{75}\text{-Al}_2\text{O}_3$  in the presence of TEOA.

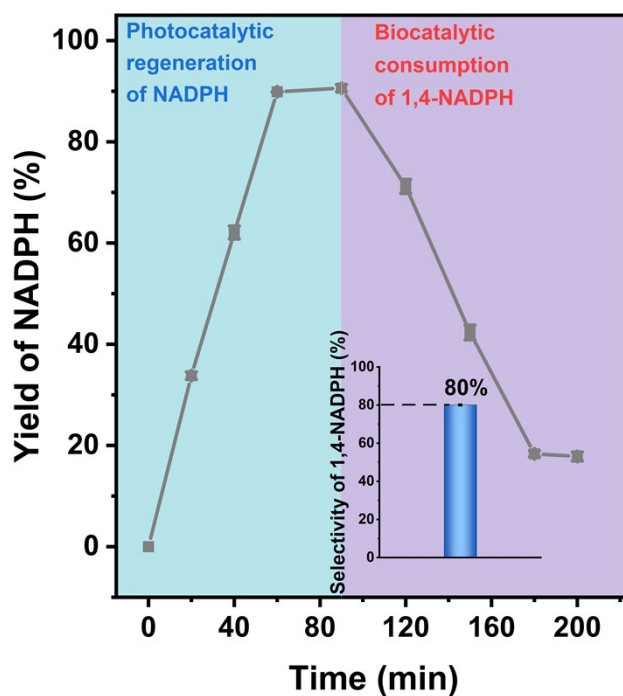

**Fig. S13.** NADPH yield over time (0-90 min) during photocatalytic reduction of  $\text{NADP}^+$  in the presence of 0.5 M TEOA and biocatalytic consumption of 1,4-NADPH (with addition of ADH and acetaldehyde at 37 °C) against time (90-200 min). Inset in (b) shows the selectivity of 1,4-NADPH.

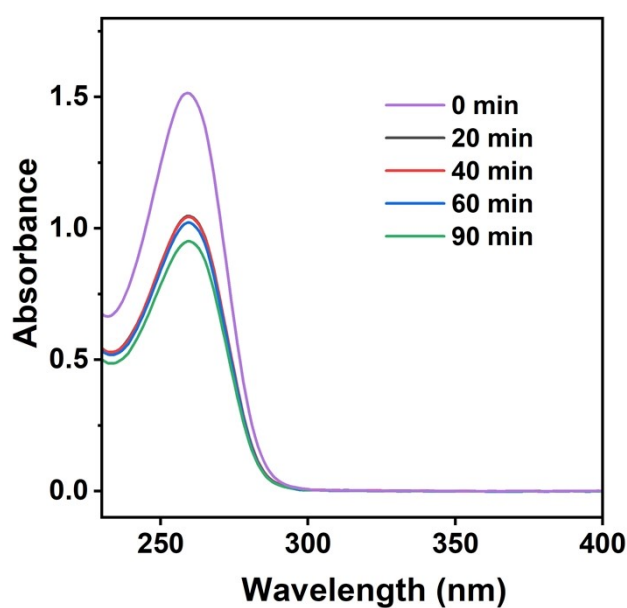

**Fig. S14.** UV-vis spectra of fresh  $\text{NAD}^+$  aqueous solution and the supernatants centrifuged from in-the-dark  $\text{NAD}^+$  adsorption by  $\text{Bi}_{12}\text{O}_{17}\text{Cl}_2\text{-Bi}_{48}\text{Al}_2\text{O}_{75}\text{-Al}_2\text{O}_3$  at different time.

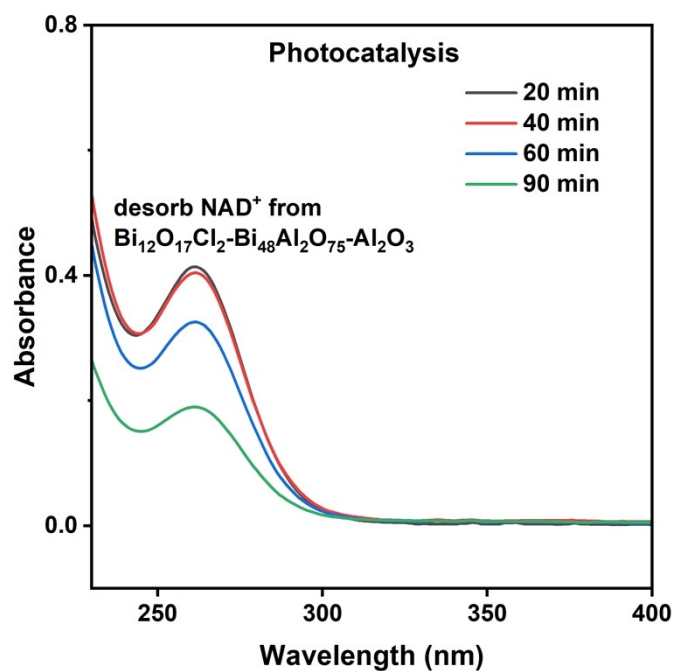

**Fig. S15.** UV-vis spectra of the supernatants centrifuged from  $\text{NAD}^+$  desorption experiments after photocatalytic reduction of  $\text{NAD}^+$  by  $\text{Bi}_{12}\text{O}_{17}\text{Cl}_2\text{-Bi}_{48}\text{Al}_2\text{O}_{75}\text{-Al}_2\text{O}_3$  at different time.

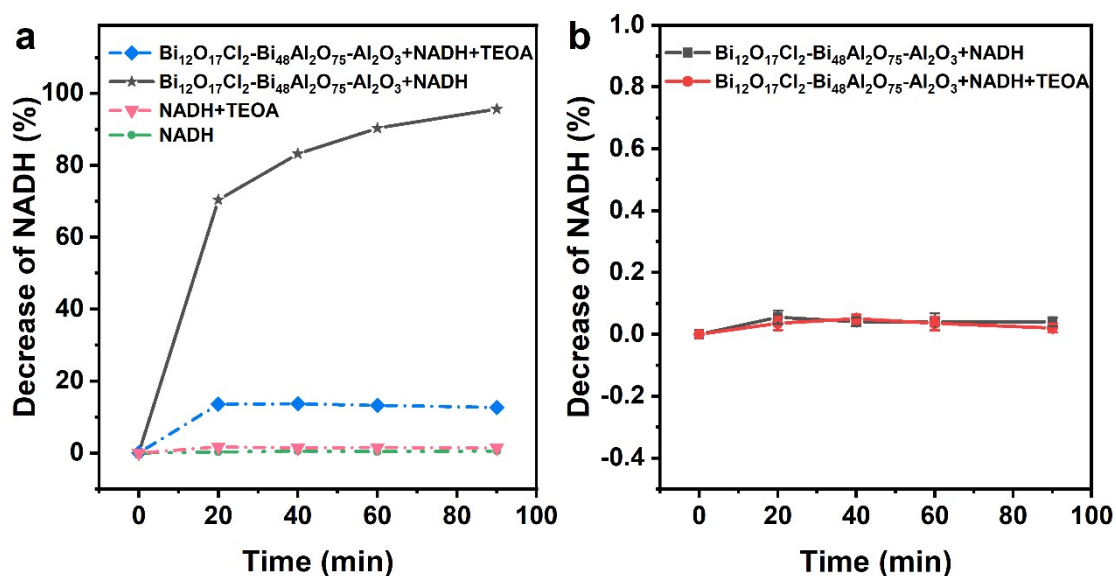

**Fig. S16.** (a) the stability of NADH in different conditions under lighting of 455 nm LED lamp; and (b) adsorption of NADH on  $\text{Bi}_{12}\text{O}_{17}\text{Cl}_2\text{-Bi}_{48}\text{Al}_2\text{O}_{75}\text{-Al}_2\text{O}_3$  in aqueous solution without and with TEOA in the dark.

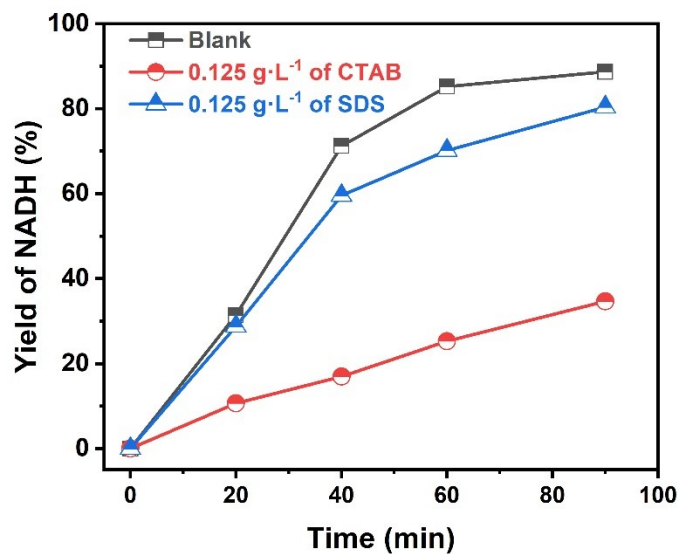

**Fig. S17.** The photocatalytic NADH yields at different time by  $1.25 \text{ g}\cdot\text{L}^{-1}$  of  $\text{Bi}_{12}\text{O}_{17}\text{Cl}_2$ - $\text{Bi}_{48}\text{Al}_2\text{O}_{75}$ - $\text{Al}_2\text{O}_3$  in the presence of  $0.125 \text{ g}\cdot\text{L}^{-1}$  of CTAB and SDS.

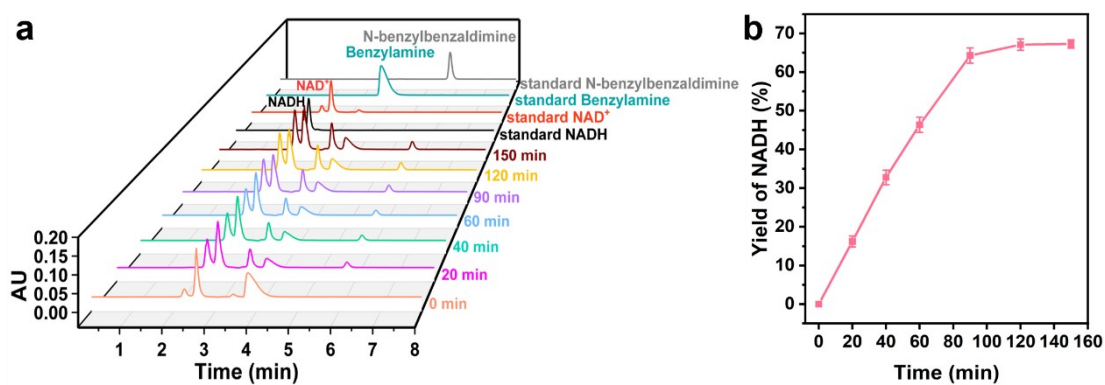

**Fig. S18.** (a) liquid chromatograms and (b) NADH yield at different time for the coupling of photocatalytic reduction of  $\text{NAD}^+$  and oxidation of benzylamine by  $\text{Bi}_{12}\text{O}_{17}\text{Cl}_2$ - $\text{Bi}_{48}\text{Al}_2\text{O}_{75}$ - $\text{Al}_2\text{O}_3$ .



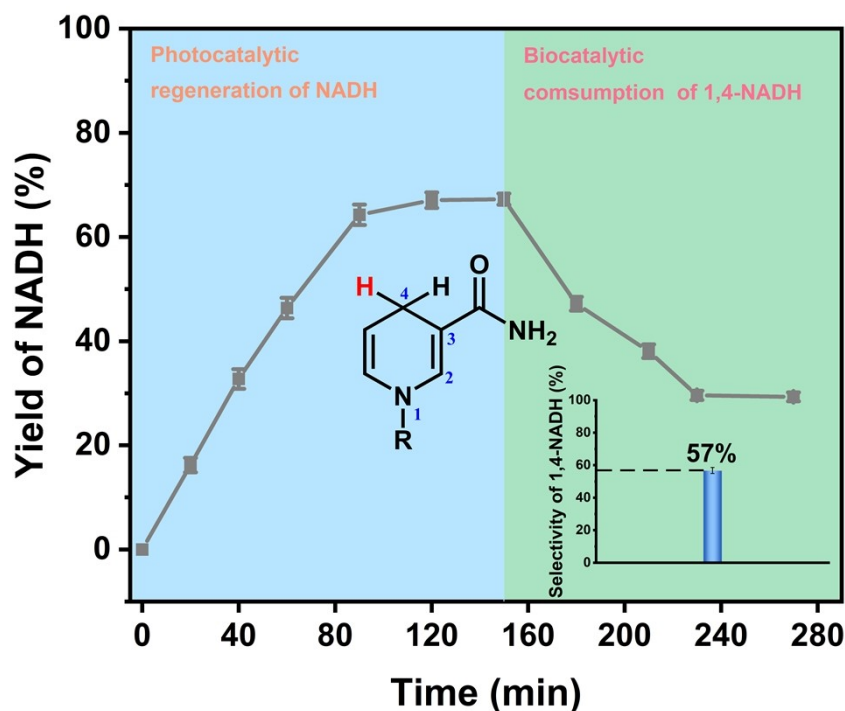

**Fig. S19.** NADH yields over time (0-150 min) during photocatalytic reduction of  $\text{NAD}^+$  in the presence of 5 mM benzylamine and biocatalytic consumption of 1,4-NADH (with addition of ADH and acetaldehyde at 37 °C) against time (150-280 min). Inset shows the selectivity of 1,4-NADH.

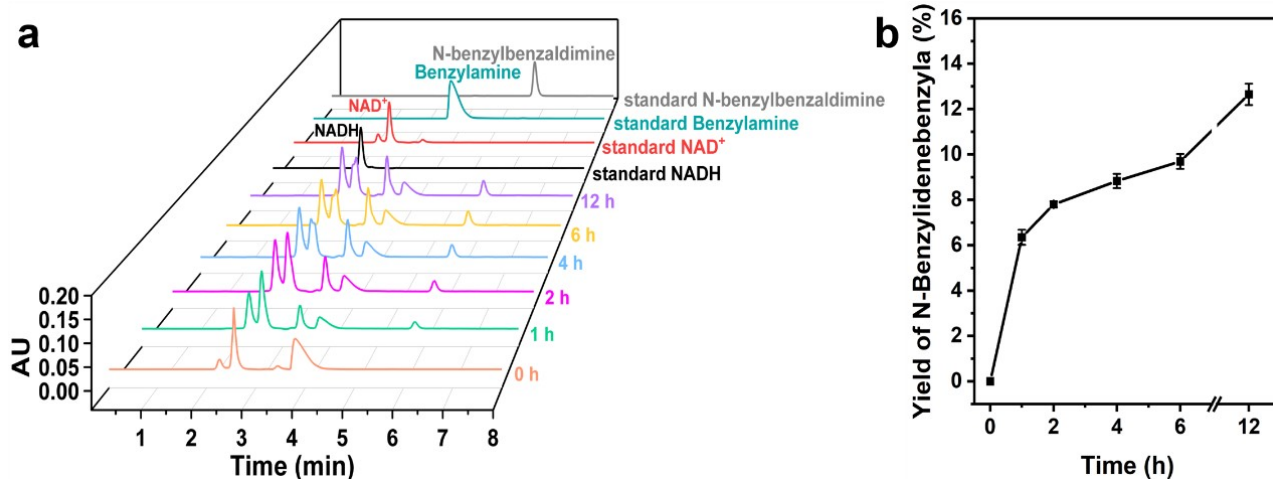

**Fig. S20.** (a) liquid chromatograms and (b) *N*-benzylidenebenzyla yields at different time for the coupling of photocatalytic reduction of  $\text{NAD}^+$  and oxidation of benzylamine by  $\text{Bi}_{12}\text{O}_{17}\text{Cl}_2\text{-Bi}_{48}\text{Al}_2\text{O}_{75}\text{-Al}_2\text{O}_3$ .

**Table S1** A summary of NADH yields and true biological activity of 1,4-NADH validated by enzymes in the reported photocatalytic regeneration systems.

| Photocatalyst                                                                                                                          | Electron Donor                      | Yield of NADH (%) | Yield of 1,4-NADH (%) | Light source                             | Mediator | Ref              |
|----------------------------------------------------------------------------------------------------------------------------------------|-------------------------------------|-------------------|-----------------------|------------------------------------------|----------|------------------|
| Bi <sub>12</sub> O <sub>17</sub> Cl <sub>2</sub> -<br>Bi <sub>48</sub> Al <sub>2</sub> O <sub>75</sub> -Al <sub>2</sub> O <sub>3</sub> | TEOA, 0.5 M                         | 89 (NADH)         | 68.5                  | 455 nm LED lamp                          | —        | <i>This work</i> |
|                                                                                                                                        | TEOA, 0.5 M                         | 92 (NADPH)        | 73.6 (1,4-NADPH)      |                                          |          |                  |
|                                                                                                                                        | Benzylamine 5 mM                    | 67 (NADH)         | 38.2                  |                                          |          |                  |
| g-C <sub>3</sub> N <sub>4</sub>                                                                                                        | TEOA, 16 v/v%;<br>PBS buffer, 0.1 M | 40                | 0                     | 80 W Xe lamp with a 400 nm cutoff filter | —        | 5                |
| N,S-CDs                                                                                                                                | TEOA 0.4 M                          | 52.3              | 42.92                 | 405 nm LED lamp                          | —        | 6                |
|                                                                                                                                        | glucose or fructose                 | —                 | 8                     |                                          |          |                  |
| Mesoporous g-C <sub>3</sub> N <sub>4</sub>                                                                                             | TEOA, 1 M                           | 50                | validation by enzymes | 420 nm LED lamp                          | —        | 7                |
| Au NPs                                                                                                                                 | TEOA, 1 M                           | 11.0              | validation by         | 450 nm continuous wave                   | —        | 8                |

|                                                    |                                  |                |                       |                                                                                             |                                                   |    |
|----------------------------------------------------|----------------------------------|----------------|-----------------------|---------------------------------------------------------------------------------------------|---------------------------------------------------|----|
|                                                    |                                  |                | enzymes               | (CW) diode laser                                                                            |                                                   |    |
| CZGO@5%Pt                                          | TEOA, 0.75 M                     | 74.8/80.6/83.5 | validation by enzymes | In the dark (Pre-lighted the catalyst by 500 W Xe lamp with a 420 nm cutoff filter for 1 h) | —                                                 | 9  |
| TP-COF                                             | TEOA, 15 w/v%; PBS buffer, 0.1 M | 45.5           | Not measured          | 300 W Xe lamp with a 420 nm cutoff filter                                                   | —                                                 | 10 |
| Mesoporous g-C <sub>3</sub> N <sub>4</sub> spheres | TEOA, 15 w/v%; PBS buffer, 0.1 M | 50             | Not measured          | 420 nm LED lamp                                                                             | —                                                 | 11 |
| Polydopamine/g-C <sub>3</sub> N <sub>4</sub>       | TEOA, 15 w/v%; PBS buffer, 0.1 M | 94.7           | Not measured          | Xe lamp with a 420 nm cutoff filter                                                         | —                                                 | 12 |
| Potassium-ionized graphitic carbon nitride         | TEOA, 1M; PBS buffer, 0.1 M      | 80             | 100                   | $\lambda > 420$ nm, visible light                                                           | 0.2 mM [Cp*Rh(bpy)H <sub>2</sub> O] <sup>2+</sup> | 13 |
| Tetra(4-carboxyphenyl)                             | TEOA, 5 mM; PBS                  | 81.5           | 29.1                  | 330 W Xe lamp with                                                                          | 0.5 mM [Cp*Rh(bpy)                                | 14 |

|                                                                    |                                  |      |                       |                                           |                                                     |    |
|--------------------------------------------------------------------|----------------------------------|------|-----------------------|-------------------------------------------|-----------------------------------------------------|----|
| porphyrin (TCPP)                                                   | buffer, 0.05 M                   |      |                       | a 400 nm cutoff filter                    | H <sub>2</sub> O] <sup>2+</sup>                     |    |
| TPTTA <sub>5</sub> @TPBp<br>y <sub>0.75</sub> -Rh/SiO <sub>2</sub> | TEOA (15 w/v %; PBS buffer       | 69   | validation by enzymes | λ ≥ 420 nm, visible light                 | 0.42% [Cp*Rh(bpy) H <sub>2</sub> O] <sup>2+</sup>   | 15 |
| carbon nitride nanorods                                            | TEOA, 15 w/v%; PBS buffer, 0.1 M | 72   | 72                    | λ > 420 nm visible light                  | 0.5 mM [Cp*Rh(bpy) H <sub>2</sub> O] <sup>2+</sup>  | 16 |
| CdS-TiO <sub>2</sub> nanotubular film                              | TEOA, 15 w/v%; PBS buffer, 0.1 M | 75.2 | validation by enzymes | 500 W Xe lamp with a 420 nm cutoff filter | 0.25 mM [Cp*Rh(bpy) H <sub>2</sub> O] <sup>2+</sup> | 17 |
| CdS-coated SiO <sub>2</sub>                                        | TEOA, 15 w/v%; PBS buffer, 0.1 M | 70.0 | validation by enzymes | λ > 420 nm visible light                  | 0.25 mM [Cp*Rh(bpy) H <sub>2</sub> O] <sup>2+</sup> | 18 |
| Co/C <sub>3</sub> N <sub>4</sub>                                   | TEOA, 15 w/v%; PBS buffer, 0.2 M | 99   | validation by enzymes | 450 nm LED lamp                           | 0.25 mM [Cp*Rh(bpy) H <sub>2</sub> O] <sup>2+</sup> | 19 |
| FF/THPP/nPt                                                        | TEOA, 15 w/v%; PBS buffer, 0.1 M | 96   | validation by enzymes | 450 W Xe lamp λ > 400 nm visible light    | 0.5 mM [Cp*Rh(bpy) H <sub>2</sub> O] <sup>2+</sup>  | 20 |
| QD@Flake g-                                                        | TEOA, 10                         | 22.5 | Not                   | 500 W Xe                                  | 0.25 mM                                             | 21 |

|                                  |                                  |       |                     |                                                       |                                                           |    |
|----------------------------------|----------------------------------|-------|---------------------|-------------------------------------------------------|-----------------------------------------------------------|----|
| C <sub>3</sub> N <sub>4</sub>    | w/v%;<br>PBS<br>buffer, 0.1<br>M |       | measur<br>ed        | lamp with<br>a 420 nm<br>cutoff<br>filter             | [Cp*Rh(bpy)<br>H <sub>2</sub> O] <sup>2+</sup>            |    |
| T-COF-2                          | TEOA,<br>0.9 M                   | 43.8  | Not<br>measur<br>ed | 300 W Xe<br>lamp with<br>a 420 nm<br>cutoff<br>filter | 0.3 mM<br>[Cp*Rh(bpy)<br>H <sub>2</sub> O] <sup>2+</sup>  | 22 |
| Carbon-doped<br>TiO <sub>2</sub> | H <sub>2</sub> O                 | 63.98 | Not<br>measur<br>ed | λ>400 nm<br>visible<br>light                          | 0.3 mM<br>[Cp*Rh(bpy)<br>H <sub>2</sub> O] <sup>2+</sup>  | 23 |
| Pt NPs                           | TEOA,<br>0.4 M                   | 86    | Not<br>measur<br>ed | 330 W Xe<br>lamp with<br>a 420 nm<br>cutoff<br>filter | 0.25 mM<br>[Cp*Rh(bpy)<br>H <sub>2</sub> O] <sup>2+</sup> | 24 |

**Table S2** Concentration of  $\text{NAD}^+$  desorbed from  $\text{Bi}_{12}\text{O}_{17}\text{Cl}_2\text{-Bi}_{48}\text{Al}_2\text{O}_{75}\text{-Al}_2\text{O}_3$  ( $C_{\text{desorb}}$ ) and involved in photocatalysis ( $C_{\text{photocatalysis}}$ ).

|                                                  | 20 min | 40 min | 60 min | 90 min |
|--------------------------------------------------|--------|--------|--------|--------|
| $C_0$ (g L <sup>-1</sup> )                       | 0.20   | 0.20   | 0.20   | 0.20   |
| $C_{\text{desorb}}$ (g L <sup>-1</sup> )         | 0.05   | 0.05   | 0.04   | 0.02   |
| $C_{\text{photocatalysis}}$ (g L <sup>-1</sup> ) | 0.15   | 0.15   | 0.16   | 0.18   |

$C_0$ : initial concentration of  $\text{NAD}^+$ .

$C_{\text{desorb}}$ : the concentration of  $\text{NAD}^+$  desorbed from  $\text{Bi}_{12}\text{O}_{17}\text{Cl}_2\text{-Bi}_{48}\text{Al}_2\text{O}_{75}\text{-Al}_2\text{O}_3$  at different time.

$C_{\text{photocatalysis}}$  = the concentration of  $\text{NAD}^+$  actually involved in photocatalysis at different time.

## References

1. G. Kresse and J. Furthmüller, *Comput. Mater.*, 1996, **6**, 15-50.
2. John P. Perdew, Kieron Burke and M. Ernzerhof, *Phys. Rev. Lett.*, 1996, **77**, 3865-3868.
3. P. E. Blöchl, *Phys. Rev. B*, 1994, **50**, 17953-17979.
4. H. J. Monkhorst and J. D. Pack, *Phys. Rev. B*, 1976, **13**, 5188-5192.
5. W. Jones, J. W. H. Burnett, J. F. Shi, R. F. Howe and X. D. Wang, *Joule*, 2020, **4**, 2055-2059.
6. S. S. Liu, J. F. Shi, J. S. Jia, Y. H. Yang, S. H. Zhang, D. Yang, Y. Chen, S. H. Li and Z. Y. Jiang, *ACS Catal.*, 2023, **13**, 14233-14240.
7. J. Liu and M. Antonietti, *Energy Environ. Sci.*, 2013, **6**, 1486.
8. S. Roy, V. Jain, R. K. Kashyap, A. Rao and P. P. Pillai, *Acs Catal.*, 2020, **10**, 5522-5528.
9. X. T. Yang, Z. W. Wang, X. Tan, X. Y. Yin, Y. Sun, Y. Z. Zhu and H. F. Wang, *ACS Appl. Mater. Interfaces*, 2023, **15**, 5273-5282.
10. Y. Zhao, H. Liu, C. Wu, Z. Zhang, Q. Pan, F. Hu, R. Wang, P. Li, X. Huang and Z. Li, *Angew. Chem., Int. Ed.*, 2019, **58**, 5376-5381.
11. J. Huang, M. Antonietti and J. Liu, *J. Mater. Chem. A*, 2014, **2**, 7686-7693.
12. B. B. Ma, S. Y. Sun, H. C. He, R. Lv, J. J. Deng, T. T. Huo, Y. L. Zhao, H. L. Yu and L. Zhou, *Ind. Eng. Chem. Res.*, 2019, **58**, 23567-23573.
13. Z. Xu, F. Zhou, H. Chen and J. Wang, *ACS Catal.*, 2024, 5868-5878.
14. Y. Z. Wang, J. Sun, H. H. Zhang, Z. P. Zhao and W. F. Liu, *Catal. Sci. Technol.*, 2018, **8**, 2578-2587.
15. J. Liu, X. Ren, C. Li, M. Wang, H. Li and Q. Yang, *Appl. Catal. B Environ.*, 2022, **310**, 121314.
16. J. Liu, J. H. Huang, H. Zhou and M. Antonietti, *ACS Appl. Mater. Interfaces*, 2014, **6**, 8434-8440.
17. J. Ryu, S. H. Lee, D. H. Nam and C. B. Park, *Adv. Mater.*, 2011, **23**, 1883-1888.
18. S. H. Lee, J. Ryu, D. H. Nam and C. B. Park, *Chem. Commun.*, 2011, **47**, 4643-4645.
19. W. Liu, W. Hu, L. Yang and J. Liu, *Nano Energy*, 2020, **73**, 104750.
20. J. H. Kim, M. Lee, J. S. Lee and C. B. Park, *Angew. Chem., Int. Ed.*, 2011, **51**, 517-520.
21. D. Yang, H. J. Zou, Y. Z. Wu, J. F. Shi, S. H. Zhang, X. D. Wang, P. P. Han, Z. W. Tong and Z. Y. Jiang, *Ind. Eng. Chem. Res.*, 2017, **56**, 6247-6255.
22. Y. Chen, P. Li, J. Zhou, C. T. Buru, L. Dordevic, P. Li, X. Zhang, M. M. Cetin, J. F. Stoddart, S. I. Stupp, M. R. Wasielewski and O. K. Farha, *J. Am. Chem. Soc.*, 2020, **142**, 1768-1773.
23. Y. J. Zhong, Q. L. Chen and W. Hong, *Ind. Eng. Chem. Res.*, 2005, **44**, 4165-4170.
24. S. S. Bhoware, K. Y. Kim, J. A. Kim, Q. Wu and J. Kim, *J. Phys. Chem. C*, 2011, **115**, 2553-2557.
